# Supplementary material
Source: PubMed Central journal article supplement (PMC4119023)
Supplement: NIHMS607525-supplement-02.pdf [file NIHMS607525-supplement-02.pdf]

**Figure S1. Hsu et al., 2014**

**A**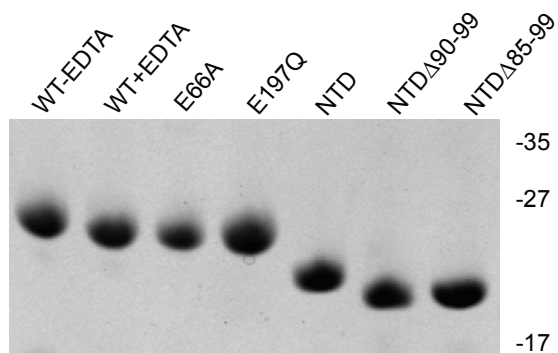**B**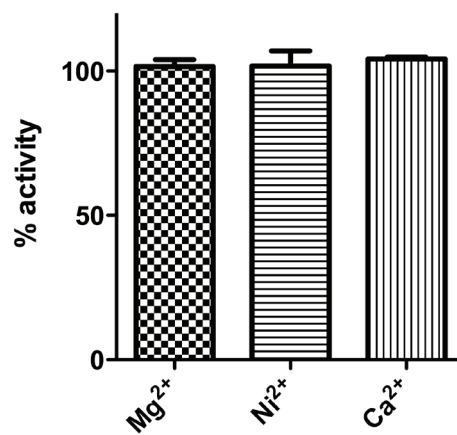**C**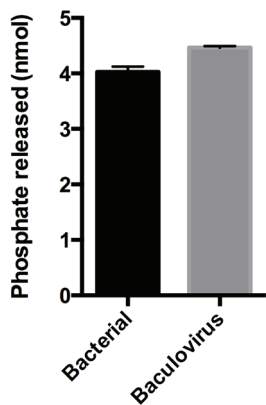**D**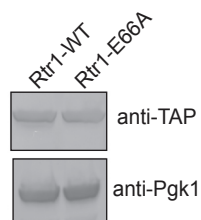**E**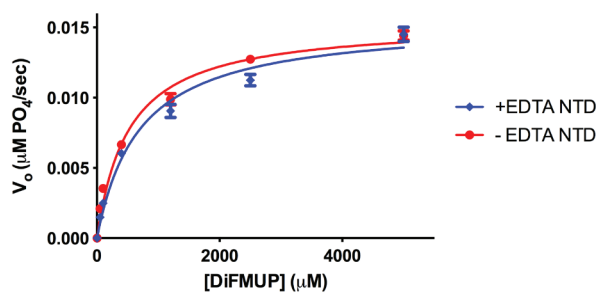

Figure S2. Hsu et al., 2014

**A**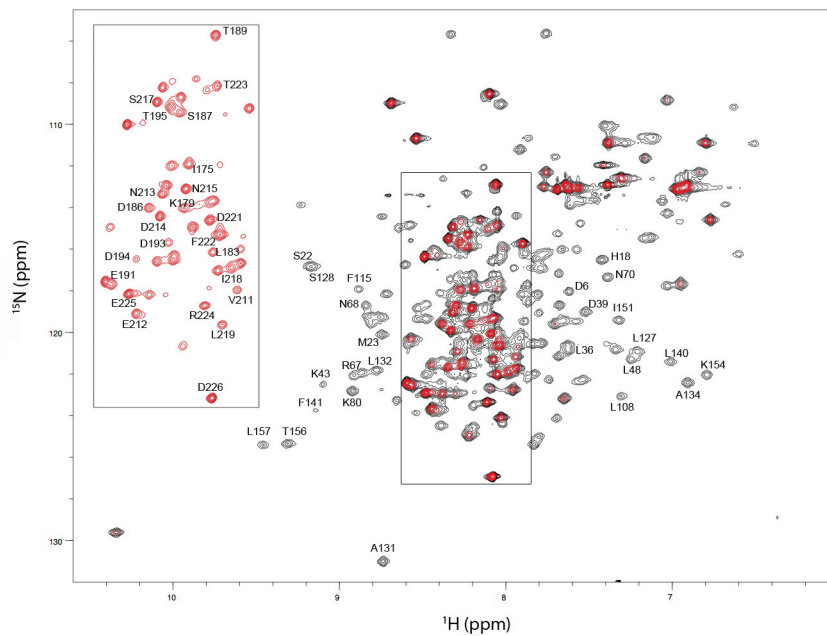**B**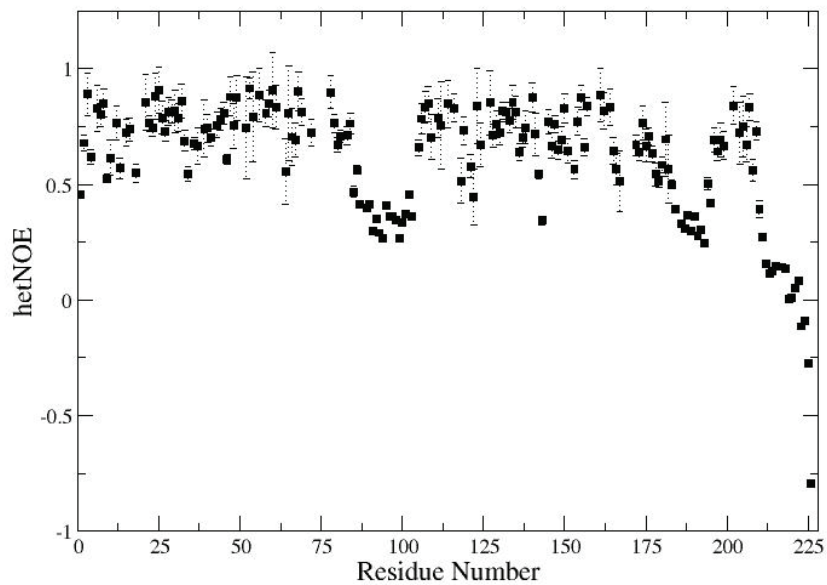

**Figure S3. Hsu et al., 2014**

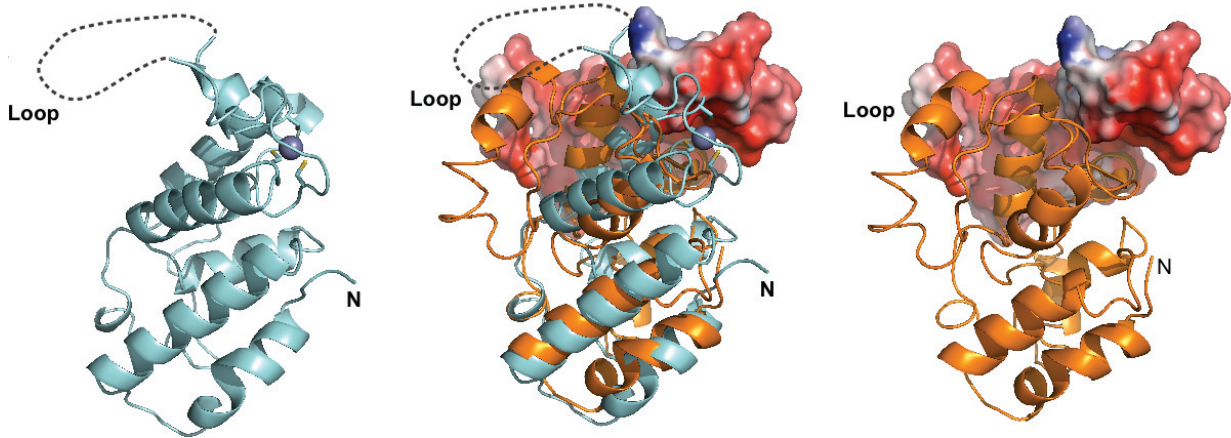

**Figure S4. Hsu et al., 2014**

**A**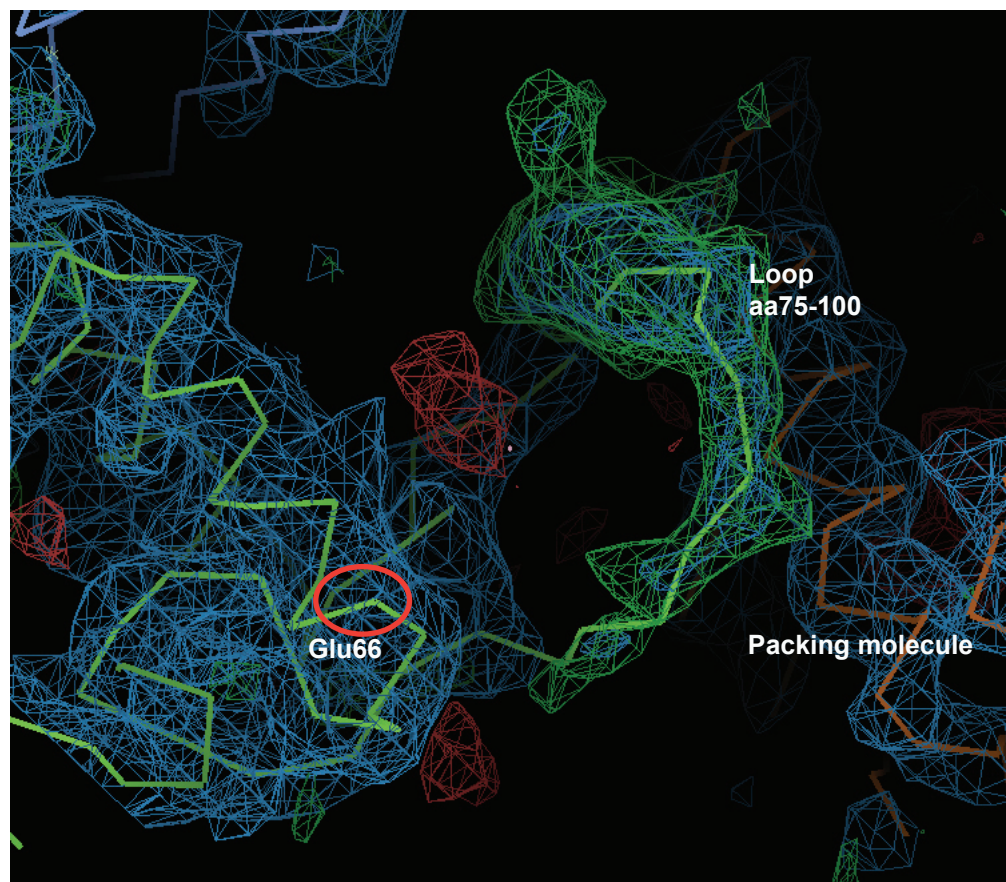**B**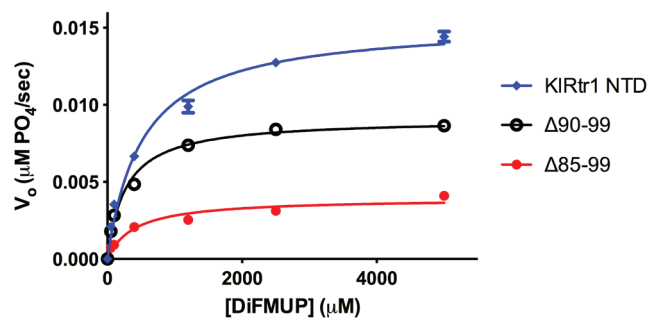**C**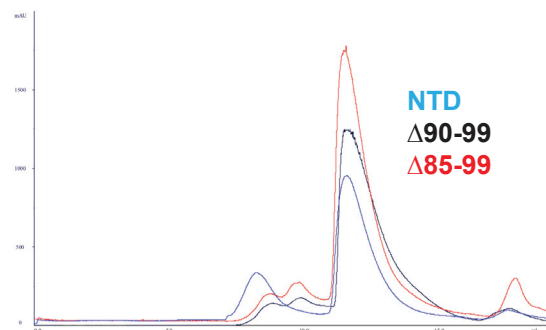

Figure S5. Hsu et al., 2014
